# Supplementary material for: Long noncoding RNA DLGAP1-AS1 promotes the progression of glioma by regulating the miR-1297/EZH2 axis
Source: PubMed Central journal article supplement (PMC8109124; doi:10.18632/aging.202923), 2021-04-26
Supplement: aging-13-202923-s001.pdf [file aging-13-202923-s001.pdf]

SUPPLEMENTARY FIGURE

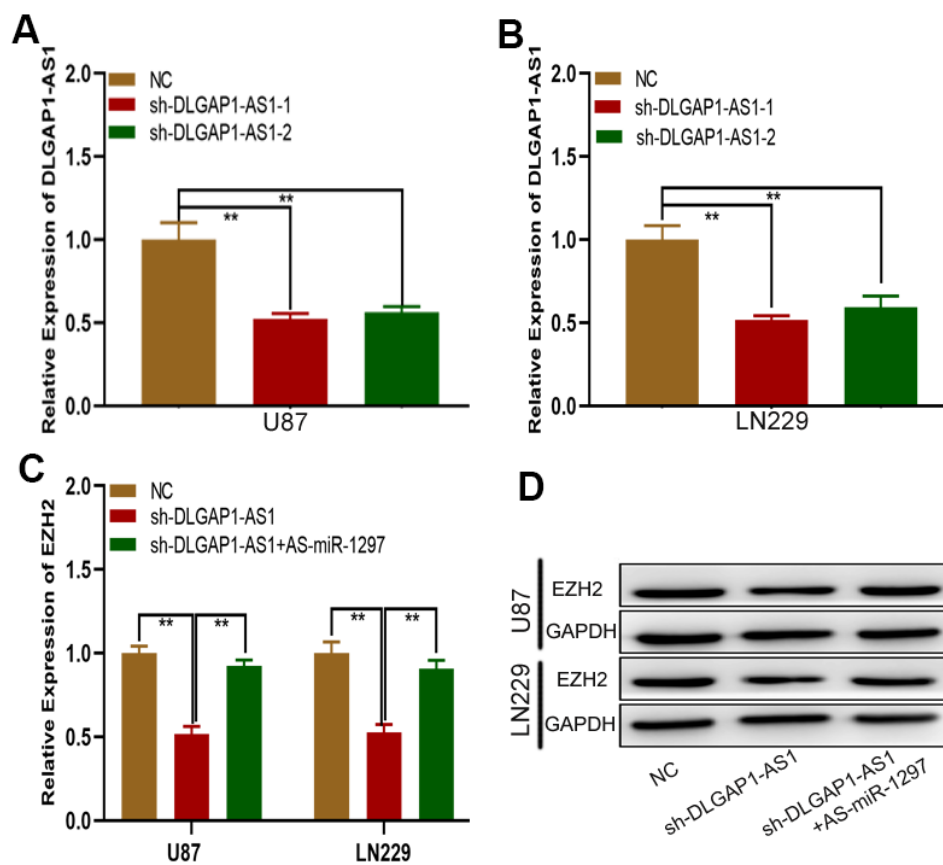

**Supplementary Figure 1.** (A, B) qRT-PCR analysis of DLGAP1-AS1 expression in U87 and LN229 cells transfected with NC, sh-DLGAP1-AS1-1 or sh-DLGAP1-AS1-2. (C, D) Expression of EZH2 in the cells transfected with NC, sh-DLGAP1-AS1 or sh-DLGAP1-AS1 together with miR-1297 inhibitors measured by qRT-PCR and western blotting.
